# Supplementary material
Source: publisher site journal article supplement (https://www.dovepress.com/get_supplementary_file.php?f=512814.docx)
Supplement: Supplementary file 1 [file get_supplementary_file.php]

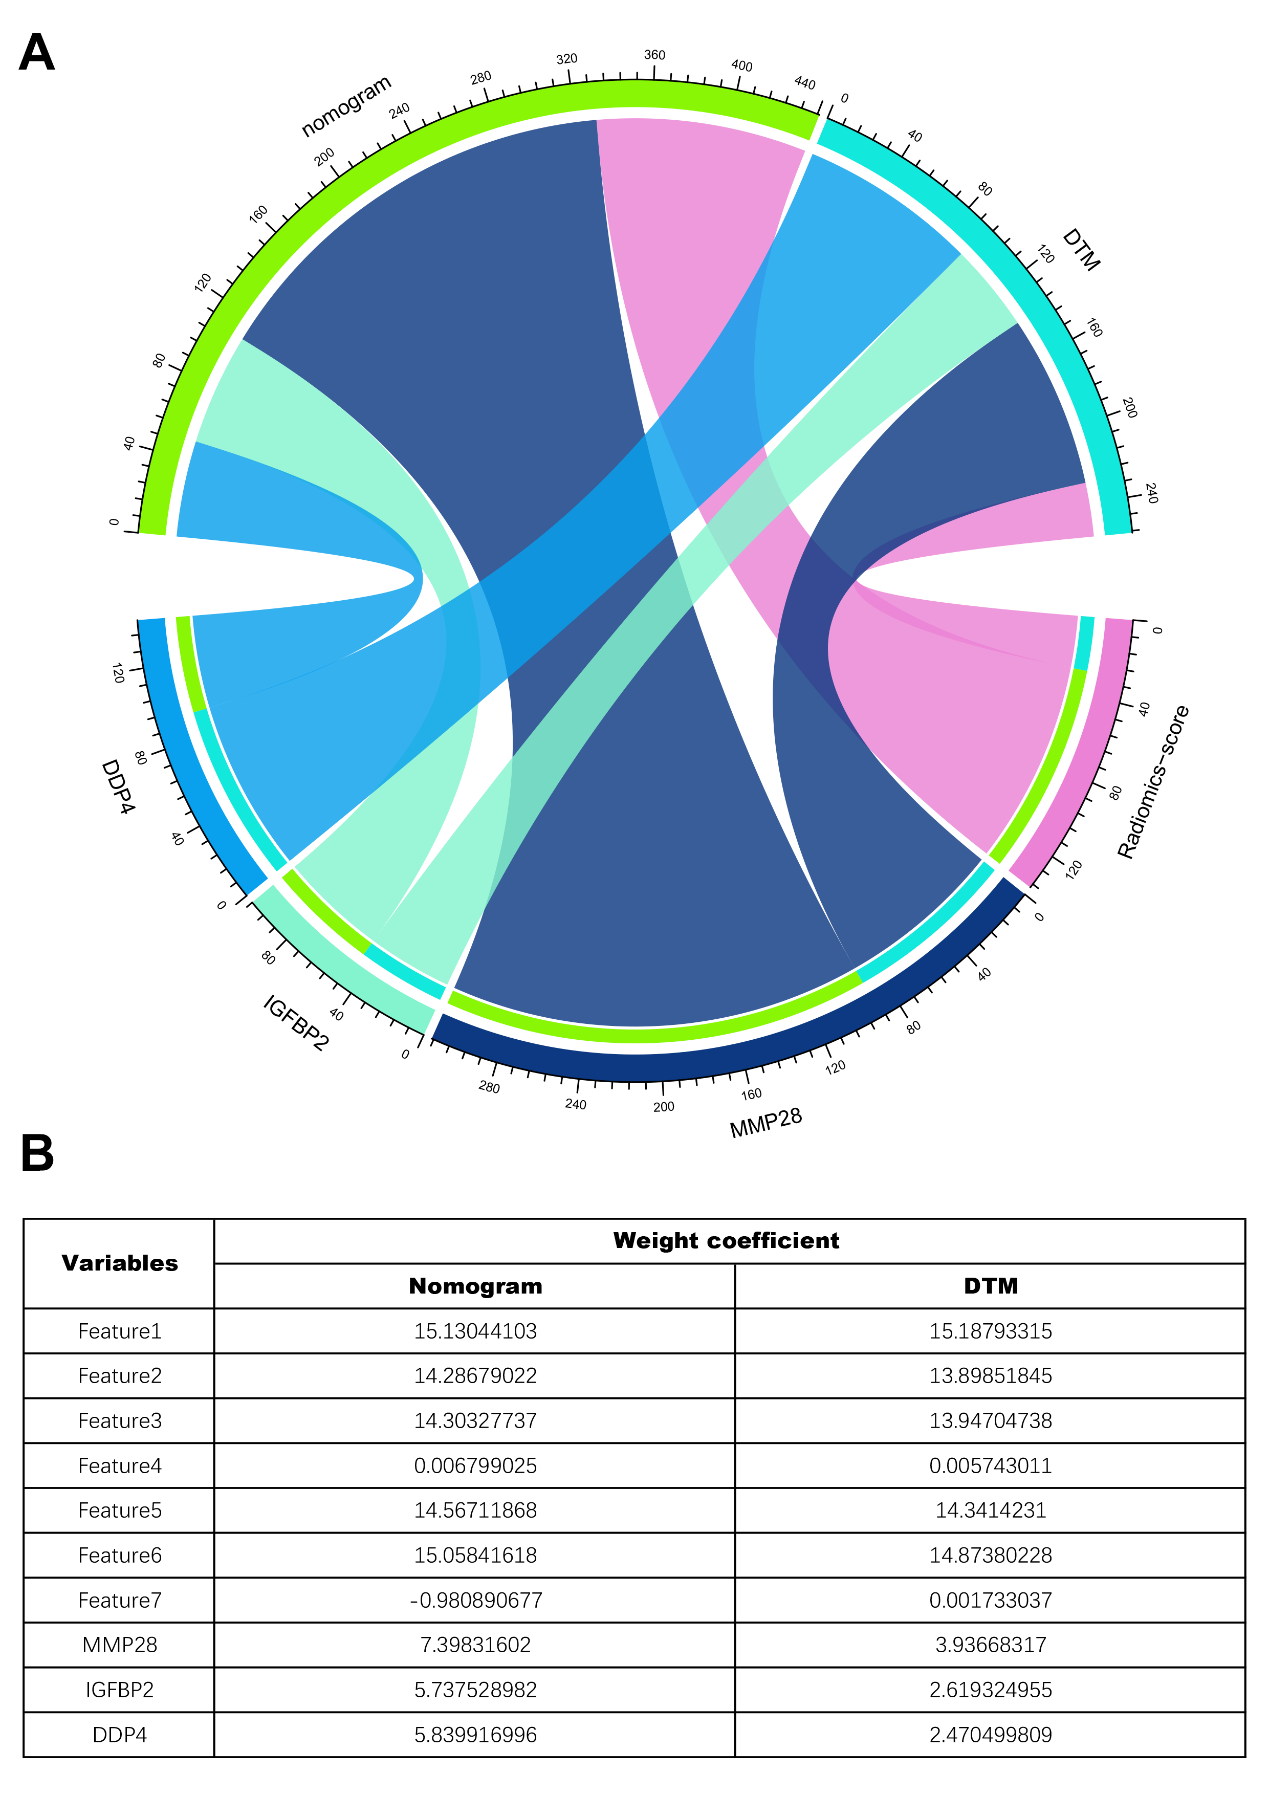


Supplementary figure1. The weight distribution of candidate parameters in the prediction model.(A) Chord plot of weight distribution of candidate parameters;(B) The weight value arrangement of candidate parameters in the prediction model.
